# Supplementary material for: Phenotypic profile of expanded NK cells in chronic lymphoproliferative disorders: a surrogate marker for NK-cell clonality
Source: PubMed Central journal article supplement (PMC4767482; doi:10.18632/oncotarget.5480), 2015-11-06
Supplement: oncotarget-06-42938-s001.pdf [file oncotarget-06-42938-s001.pdf]

SUPPLEMENTARY FIGURES

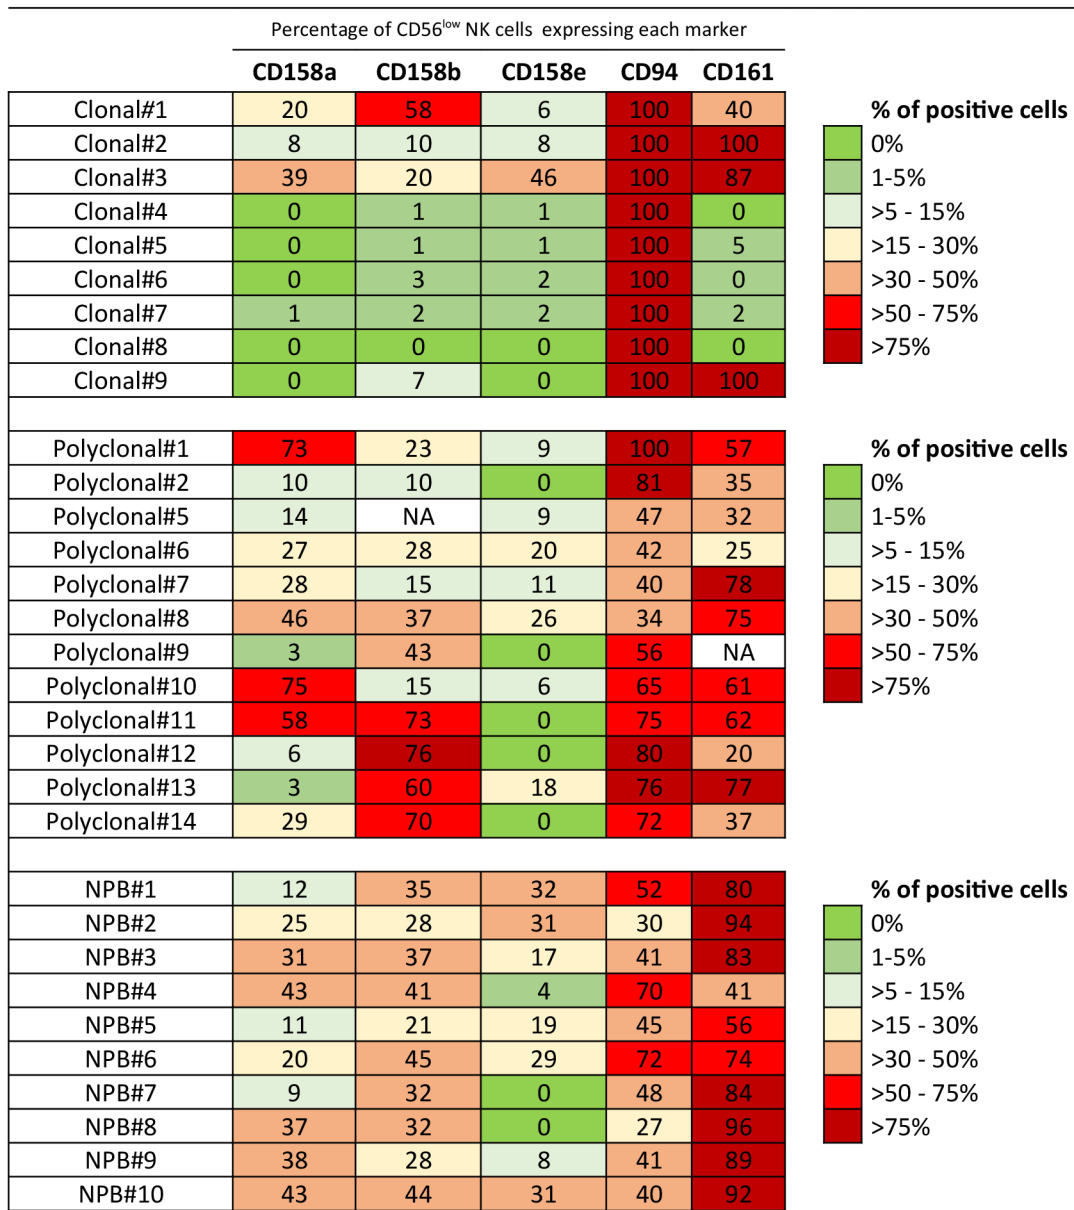

NA: not available. NPB: normal peripheral blood (from healthy adult donors)

**Supplementary Figure S1: Expression of the CD158a/b/e killer-immunoglobulin-like receptors (KIR) and the CD94 and CD161 C-type lectin-like receptors on peripheral blood CD56<sup>low</sup> NK cells from patients with clonal and polyclonal expansions of CD56<sup>low</sup> NK cells vs. normal subjects, analyzed in each individual case.** Color codes have been arbitrarily selected according to the percentage of cells being positive for each individual marker, to better highlight the differences in the repertoire of killer-associated molecules among the three groups.

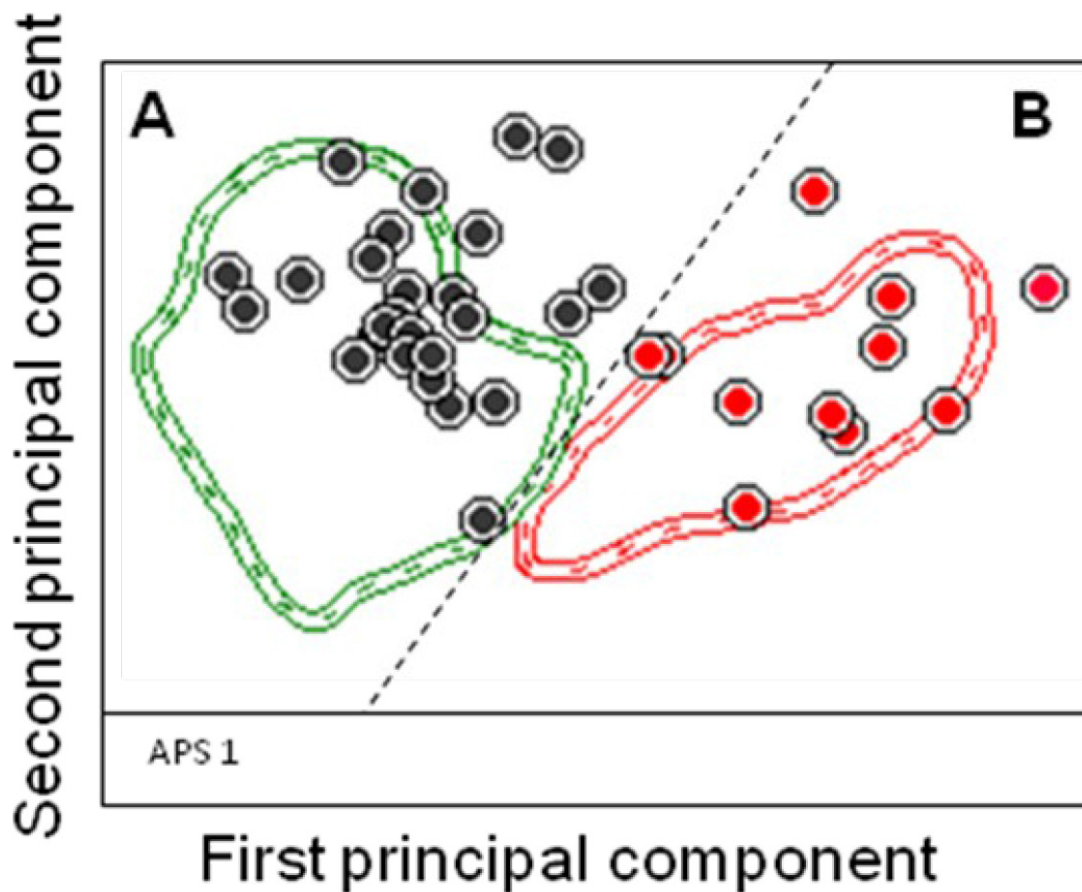

**Supplementary Figure S2: PCA-based comparison (APS view of PC1 vs. PC2) of the whole immunophenotypic profile of CD56<sup>low</sup> NK cells from those 37 cases in which clonality assessment could not be performed and/or was not informative, projected on the contour lines representing one standard deviation curves of CD56<sup>low</sup> NK cells from both normal (healthy adults) and reactive/polyclonal (green contour line) vs. clonal (red contour line) cases from the test series.** In the APS plot, the 37 cases used in the validation phase are represented as individual cases. Clonal and polyclonal cases used in the testing phase have been deleted from the plot, and only their contour (standard deviation) lines are shown; each circle represents one single case (median expression levels observed for all the phenotypic parameters evaluated in PC1 vs. PC2). **A.** Cases predicted as being polyclonal by the SAM predictive model ( $n = 26$ ; black dots) and **B.** cases predicted as being clonal by the SAM predictive model ( $n = 11$ ; red dots) fully overlapped with those predicted by the PCA displayed here.
